# Supplementary material for: Preparation and investigation of highly selective solid acid catalysts with sodium lignosulfonate for hydrolysis of hemicellulose in corncob
Source: Royal Society of Chemistry journal article supplement (doi:10.1039/c7ra13362f), 2018-01-01
Supplement: c7ra13362f1.pdf [file c7ra13362f1.pdf]

## Supporting Information

### Preparation and Investigation of Highly Selective Solid Acid

### Catalysts with Sodium Lignosulfonate for Hydrolysis of

### Hemicellulose in Corncob

Xun Li <sup>a,#</sup>, Fengyao Shu <sup>a,b</sup>, Chao He <sup>b</sup>, Shuna Liu <sup>b,#</sup>, Noppol Leksawasdi <sup>c</sup>, Qiong Wang <sup>b,\*</sup>, Wei Qi <sup>b,\*</sup>, Md. Asraful Alam <sup>b</sup>, Zhenhong Yuan <sup>b,d</sup>, Yi Gao <sup>e</sup>

<sup>a</sup> Changsha University of Science and Technology, Changsha, 410004, China;

<sup>b</sup> Guangzhou Institute of Energy Conversion, Chinese Academy of Sciences, CAS Key Laboratory of Renewable Energy, Guangdong Key Laboratory of New and Renewable Energy Research and Development; Guangzhou, 510640, China;

<sup>c</sup> Faculty of Agro-Industry Chiang Mai University, Chiang Mai, 50100, Thailand;

<sup>d</sup> Collaborative Innovation Centre of Biomass Energy, Zhengzhou, 450002, China.

<sup>e</sup> Henan Academy of Sciences Institute of Energy Co. Ltd., Zhengzhou 450000, China

# These authors contribute equally to this work

\*Corresponding author: qiwei@ms.giec.ac.cn, wangqiong@ms.giec.ac.cn

**Number of pages:** 8

**Number of figures:** 4

**Number of table:** 2

### **Figure captions:**

**Fig. S1** the homemade tube furnace for carbonization of sodium lignosulfonate

**Fig. S2** Concentrations of byproduct (after 4% H<sub>2</sub>SO<sub>4</sub> treatment) from corncob hydrolysis catalyzed by three catalysts.

**Fig. S3** Effect of various oxidation factors on the hydrolyzed corncob. (a) H<sub>2</sub>O<sub>2</sub> concentration, (b) reaction time, (c) temperature, (d) solid/liquid ratio.

**Fig. S4** X-ray diffraction pattern of corncob and residue

### **Table captions:**

**Table S1** Acid-base titration results at different temperatures

**Table S2** Elemental analysis and acid-base titration results for the solid acid catalysts after reuse

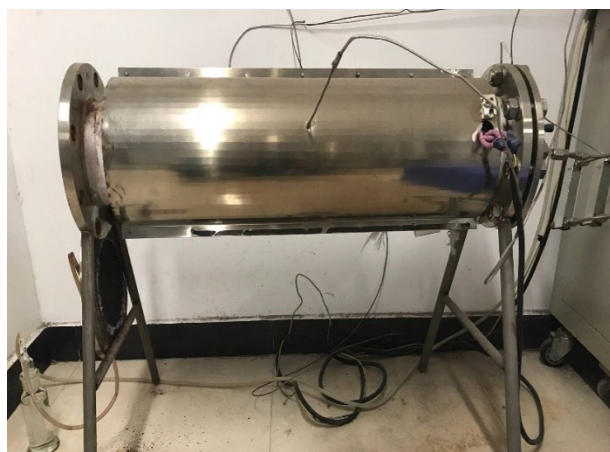

Fig. S1 the homemade tube furnace for carbonization of sodium lignosulfonate

This tube furnace is made of stainless steel, electric heating, the amount of sodium lignosulfonate was 20g each time.

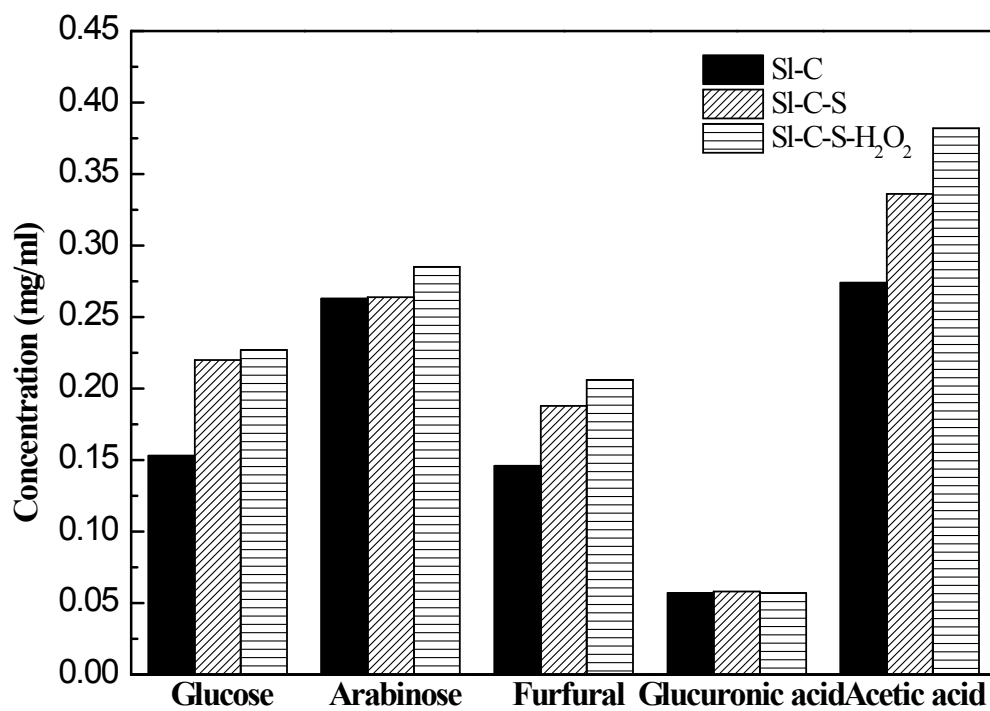

Fig. S2 Concentrations of byproduct (after 4% H<sub>2</sub>SO<sub>4</sub> treatment) from corncob hydrolysis catalyzed by three catalysts.

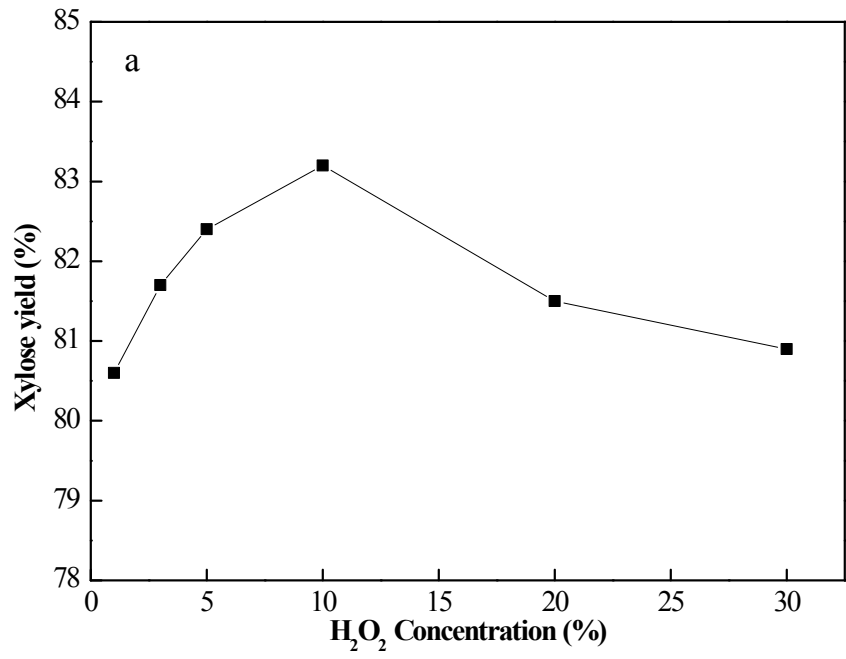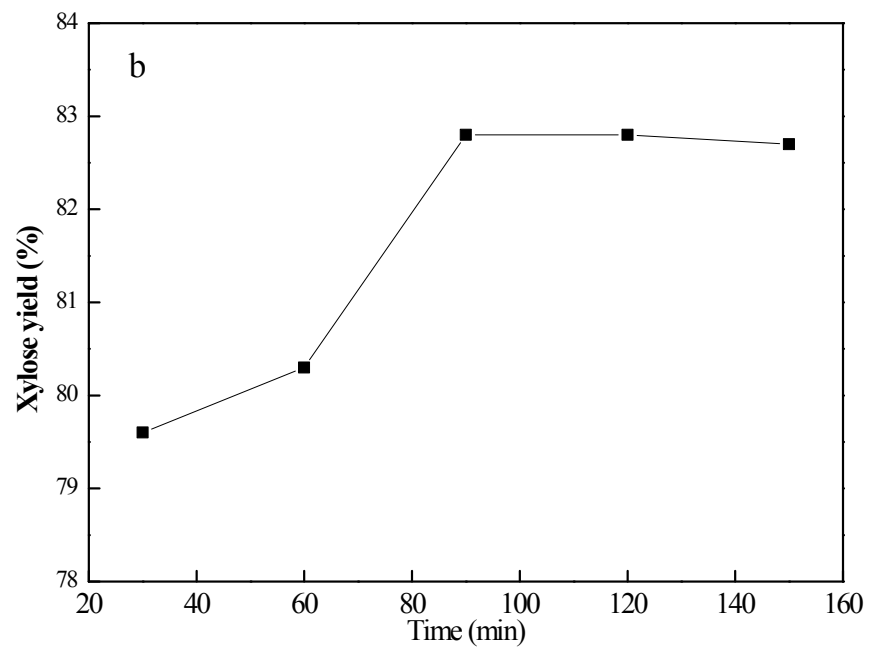

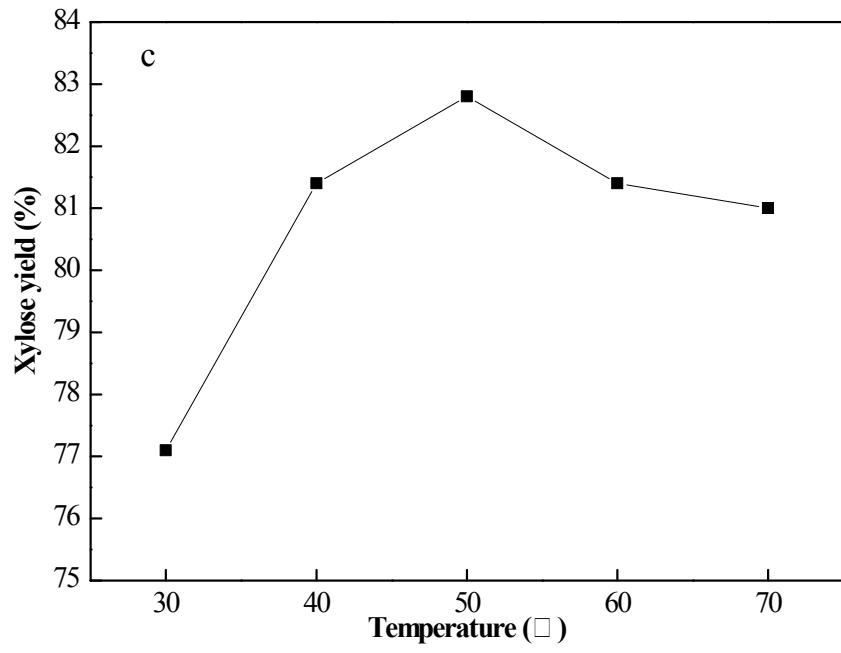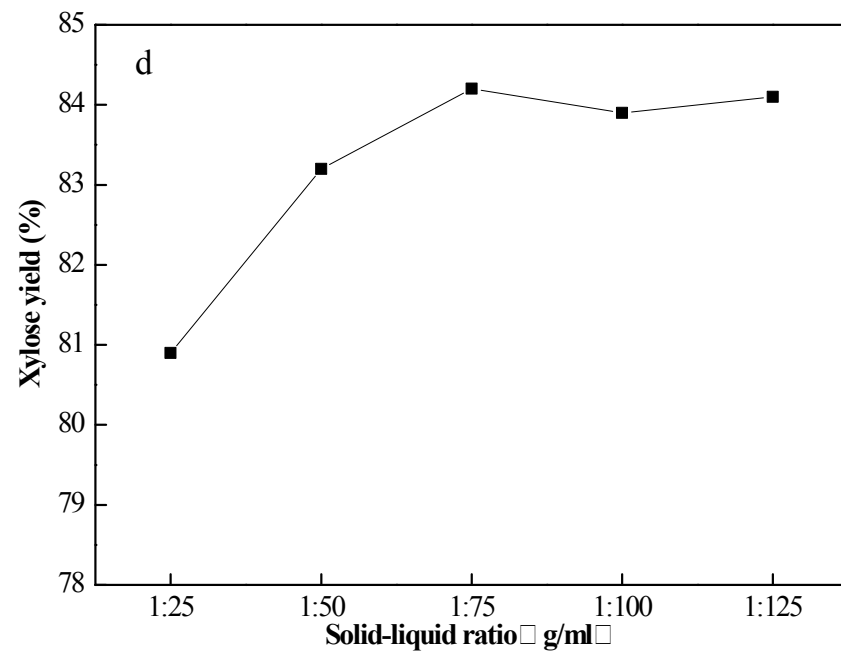

Fig. S3 Effect of various oxidation factors on the hydrolyzed corncob. (a)  $H_2O_2$  concentration, (b) reaction time, (c) temperature, (d) solid/liquid ratio.

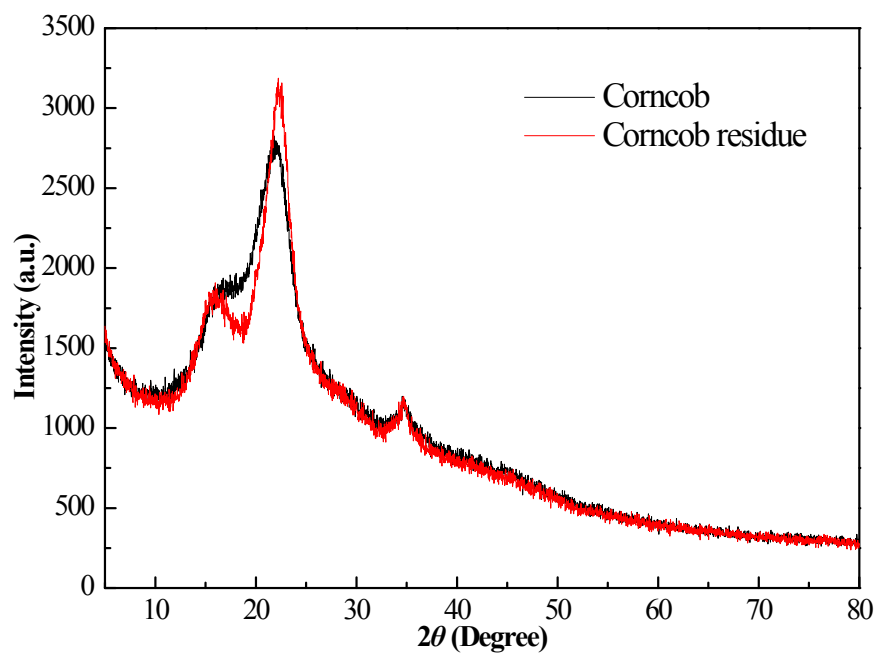

Fig. S4 X-ray diffraction pattern of corncob and residue

Table S1 Acid-base titration results at different temperatures

| Temperature(°C)                     | 200  | 250  | 300  |
|-------------------------------------|------|------|------|
| -SO <sub>3</sub> H content (mmol/g) | 0.57 | 0.68 | 0.53 |
| Total acid content (mmol/g)         | 4.16 | 4.78 | 4.08 |

Table S2 Elemental analysis and acid-base titration results for the solid acid catalysts after reuse

| Reuse times | Sulfur content (%) | -SO <sub>3</sub> H content (mmol/g) | Total acid content (mmol/g) |
|-------------|--------------------|-------------------------------------|-----------------------------|
| 1           | 2.364              | 0.68                                | 4.78                        |
| 2           | 1.922              | 0.56                                | 4.51                        |
| 3           | 1.769              | 0.52                                | 4.42                        |
| 4           | 1.625              | 0.46                                | 4.42                        |
| 5           | 1.533              | 0.46                                | 4.34                        |
